# Supplementary material for: Mini Electrodes on Ablation Catheters: Valuable Addition or Redundant Information?—Insights from a Computational Study
Source: Hindawi journal article supplement (doi:10.1155/2017/1686290), 2017-01-01
Supplement: f1 [file 1686290.f1.pdf]

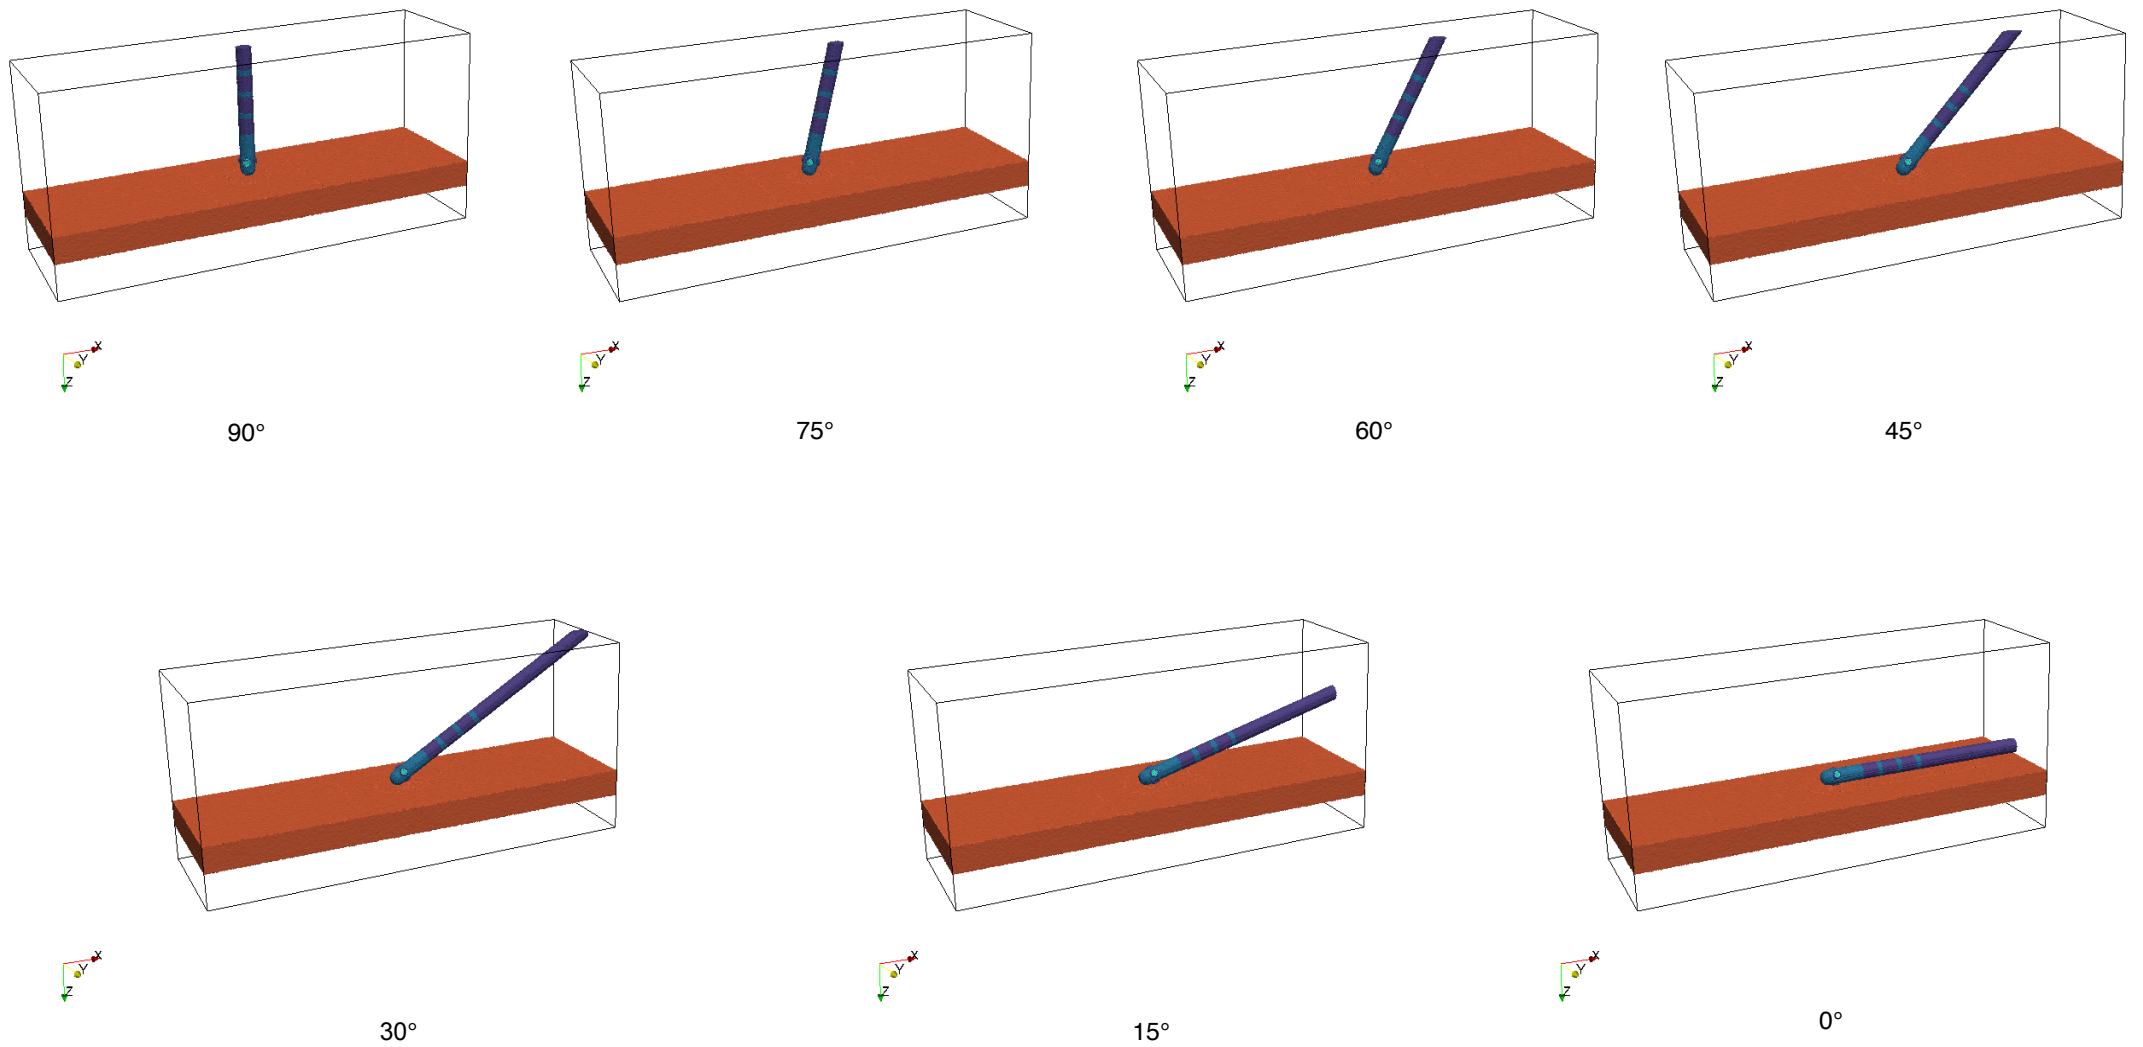

**SUPPLEMENTARY FIGURE 1:** Varying tilting angle between catheter and healthy myocardium between 90° and 0°. The excitation wavefront is propagating from the left tissue boundary (electrical activity is not shown here).

**Legend:** distal and proximal electrodes (■), isolation (■), myocardium (■), mini electrodes (■).
